# Supplementary material
Source: PubMed Central journal article supplement (PMC3705760)
Supplement: NIHMS481330-supplement-Sup_Fig_Legends.pdf [file NIHMS481330-supplement-Sup_Fig_Legends.pdf]

Supplementary Fig. S1. Biological replicate and dye swap experiment for S-FLOS analysis of protein extracts from cells with or without IFN $\gamma$ /LPS stimulation for 24 h. S-FLOS analysis was performed as in [Fig 5B](#). In contrast, proteins from stimulated cells were labeled with Cy5, whereas proteins from unstimulated control cell were labeled with Cy3 using the S-FLOS assay. The backgrounds and S-FLOS fluorescence increase in proteins from the stimulated cells were similar to Figure 5B

Supplementary Fig. S2. *In situ* staining of S-nitrosated proteins using S-FLOS. RAW264.7 cells grown on fibronectin-coated coverslips were treated with IFN $\gamma$ /LPS (to stimulate NOS2) for 48 h in the presence or absence of a NOS2 inhibitor (1400 W). At 0, 24, and 48 h, cells were fixed, permeabilized, and labeled with Cy3 *in situ* using the S-FLOS assay. There is a time dependent increase in SNO signal. This increase in fluorescence had the same time dependency as NO production in IFN $\gamma$ /LPS stimulated RAW 264.7 cells, measured using the Griess method (Fig. 5A). Stimulated cells grown in the NOS2 inhibitor 1400 W had a lower fluorescence signal at 48 h (+1400 W 48 h). Pretreatment of cells the 48 h time point with DTT (+DTT 48 h) to remove all nitrosation prior to MMTS blocking or omission of the ascorbate reduction step after blocking free thiols from the S-FLOS assay (-Asc 48 h) lead to complete loss of the fluorescence signal. Merged fluorescence images of DAPI staining for nuclei (blue) and S-FLOS Cy3 labeling (false colored red) at 0 and 48 h, respectively, are shown in bottom panels. The scale bars are 10 $\mu$ m. These results are consistent other fluorescent histochemical staining experiments for S-nitrosation in literature [\[21\]](#) and [\[37\]](#). *In situ* labeling of S-nitrosothiols protocol: All steps were performed in the dark. IFN $\gamma$ /LP S-stimulated and unstimulated RAW264.7 cells grown in the absence or presence of 20  $\mu$ M NOS2 inhibitor 1400 W (Cayman Chemical, [www.caymanchem.com](http://www.caymanchem.com)) on coverslips were fixed in 3% paraformaldehyde and permeabilized with 0.05% Triton X-100. After incubating cells with 20 mM MMTS in Wash Buffer (PBS containing 0.5% v/v Tween-20) for 1 h at 50 °C (with or without 5 mM DTT pretreatment), the cells were washed three times in 500  $\mu$ l Wash Buffer and incubated in 5 mM ascorbate for 1 h at room temperature. The cells were then rinsed three times with 500  $\mu$ l Wash Buffer and incubated with 10  $\mu$ M Cy3-maleimide in Labeling Buffer at 37 °C for 30 min. The samples were again washed three times in 500  $\mu$ l Wash Buffer. Fluorescence images were acquired using a Nikon Eclipse TE200 microscope and an internally-cooled 12-bit CCD camera (CoolSnapHQ, Photometrics, photomet.com). Images were collected using OpenLab software (Improvision, [www.improvision.com](http://www.improvision.com)). Nuclei of cells were labeled with DAPI (Invitrogen) and imaged using fluorescence microscopy and merged corresponding with Cy-dye image
