# Supplementary material
Source: PubMed Central journal article supplement (PMC3705760)
Supplement: NIHMS481330-supplement-Sup_Table.pdf [file NIHMS481330-supplement-Sup_Table.pdf]

## Supplemental Data:

### Peptides with Mascot scores >95% confidence probability for protein identifications

#### in Table 1.

##### Spot A7

albumin [Bos taurus]

[qij162648](#) Mass: 69248 Score: 525 albumin [Bos taurus]

| Observed | Mr(expt)  | Mr(calc)  | Delta  | Score | Peptide             |
|----------|-----------|-----------|--------|-------|---------------------|
| 507.8337 | 1013.6529 | 1013.6121 | 0.0409 | 75    | K.QTALVELLK.H       |
| 582.3406 | 1162.6667 | 1162.6233 | 0.0434 | 64    | K.LVNELTEFAK.T      |
| 653.3854 | 1304.7562 | 1304.7088 | 0.0474 | 57    | K.HLVDEPQNLIK.Q     |
| 693.8291 | 1385.6437 | 1385.6133 | 0.0304 | 77    | K.YICDNQDTISSK.L    |
| 740.4267 | 1478.8389 | 1478.7881 | 0.0508 | 84    | K.LGEYGFQNALIVR.Y   |
| 756.4592 | 1510.9038 | 1510.8355 | 0.0683 | 64    | K.VPQVSTPTLVEVSR.S  |
| 547.3394 | 1638.9964 | 1638.9304 | 0.0660 | 105   | R.KVPQVSTPTLVEVSR.S |

##### Spot B2

protein disulfide isomerase associated 3 [Mus musculus]

[qij6679687](#) Mass: 56586 Score: 398

| Observed | Mr(expt)  | Mr(calc)  | Delta  | Score | Peptide           |
|----------|-----------|-----------|--------|-------|-------------------|
| 439.2651 | 876.5157  | 876.4817  | 0.0340 | 50    | K.LNFVASR.K       |
| 498.2979 | 994.5813  | 994.5559  | 0.0254 | 55    | K.QAGPASVPLR.T    |
| 499.2733 | 996.5321  | 996.5028  | 0.0293 | 58    | K.DASVVGFFR.D     |
| 542.8030 | 1083.5914 | 1083.5600 | 0.0314 | 62    | K.YGVSGYPTLK.I    |
| 596.3183 | 1190.6221 | 1190.5931 | 0.0290 | 71    | R.LAPEYEAATR.L    |
| 399.9305 | 1196.7695 | 1196.7128 | 0.0567 | 51    | K.LSKDPNIVIAK.M   |
| 691.8818 | 1381.7491 | 1381.6725 | 0.0767 | 51    | K.SEPIPESNEGPVK.V |

##### Spot B6

serine (or cysteine) proteinase inhibitor, clade A (alpha-1 antiproteinase, antitrypsin), member 1

[qij27806941](#) Mass: 46075 Score: 249

| Observed | Mr(expt)  | Mr(calc)  | Delta  | Score | Peptide        |
|----------|-----------|-----------|--------|-------|----------------|
| 430.7603 | 859.5060  | 859.4651  | 0.0409 | 54    | K.AALTIDEK.G   |
| 457.7916 | 913.5687  | 913.5232  | 0.0455 | 59    | K.LNNELLAK.F   |
| 584.8276 | 1167.6406 | 1167.6023 | 0.0383 | 59    | K.LSISETYDLK.S |
| 589.8390 | 1177.6634 | 1177.6230 | 0.0404 | 77    | K.LVDTFLEDVK.N |

78 kDa glucose-regulated protein [Mus musculus]

[qij1304157](#) Mass: 72412 Score: 124

| Observed | Mr(expt)  | Mr(calc)  | Delta  | Score | Peptide          |
|----------|-----------|-----------|--------|-------|------------------|
| 491.2597 | 980.5049  | 980.4814  | 0.0235 | 59    | K.ETAEAYLGK.K    |
| 699.4163 | 1396.8181 | 1396.7813 | 0.0368 | 65    | K.ELEEIVQPIISK.L |

##### Spot C3 (score more than 47)

enolase 1, alpha non-neuron [Mus musculus]

[qij12963491](#) Mass: 47095 Score: 154

| Observed | Mr(expt) | Mr(calc) | Delta  | Score | Peptide       |
|----------|----------|----------|--------|-------|---------------|
| 450.2993 | 898.5841 | 898.5487 | 0.0354 | 47    | K.TIAPALVSK.K |
| 452.7520 | 903.4895 | 903.4549 | 0.0347 | 49    | R.IEEELGSK.A  |
| 472.7880 | 943.5615 | 943.4974 | 0.0641 | 57    | K.VNVVEQEK.I  |

## Spot A2

heat shock 70 protein [Mus musculus]  
[gil1661134](#) Mass: 70793 Score: 834

| Observed | Mr(expt)  | Mr(calc)  | Delta  | Score | Peptide                            |
|----------|-----------|-----------|--------|-------|------------------------------------|
| 541.3075 | 1080.6005 | 1080.5603 | 0.0402 | 59    | K.LLQDFFNKG.E                      |
| 599.3603 | 1196.7061 | 1196.6553 | 0.0508 | 51    | K.FELTGIPPAPR.G                    |
| 600.3646 | 1198.7146 | 1198.6669 | 0.0476 | 56    | K.DAGTIAGLNVLRI                    |
| 614.8437 | 1227.6728 | 1227.6207 | 0.0521 | 67    | K.VEIIANDQGNRT                     |
| 627.3391 | 1252.6636 | 1252.6087 | 0.0549 | 72    | R.FEELNADLFR.G                     |
| 635.8178 | 1269.6211 | 1269.5547 | 0.0664 | 52    | R.FDDAVVQSDMK.H + Oxidation (M)    |
| 652.3312 | 1302.6479 | 1302.5914 | 0.0565 | 64    | K.NSLESYAFNMK.A                    |
| 744.3956 | 1486.7766 | 1486.6940 | 0.0827 | 50    | R.TTPSYVAFTDTER.L                  |
| 833.4136 | 1664.8126 | 1664.7828 | 0.0299 | 60    | K.NQVAMNPTNTVFDK.R + Oxidation (M) |
| 596.6901 | 1787.0484 | 1786.9828 | 0.0656 | 57    | R.IINEPTAAAIAYGLDKK.V              |

## Spot A4

Heat shock 70kD protein 5 (glucose-regulated protein) [Mus musculus]  
[gil29748016](#) Mass: 72377 Score: 618

| Observed | Mr(expt)  | Mr(calc)  | Delta  | Score | Peptide               |
|----------|-----------|-----------|--------|-------|-----------------------|
| 491.2558 | 980.4971  | 980.4814  | 0.0157 | 59    | K.ETAEAYLGK.K         |
| 609.3525 | 1216.6905 | 1216.6234 | 0.0672 | 88    | K.DAGTIAGLNVMRI       |
| 614.8326 | 1227.6507 | 1227.6207 | 0.0300 | 70    | R.VEIIANDQGNRI        |
| 658.8472 | 1315.6798 | 1315.6295 | 0.0502 | 53    | R.NELESYAYSLK.N       |
| 699.4357 | 1396.8569 | 1396.7813 | 0.0756 | 68    | K.ELEEIVQPIISK.L      |
| 715.8677 | 1429.7209 | 1429.6837 | 0.0371 | 63    | R.TWNDPSVQQDIK.F      |
| 730.8991 | 1459.7837 | 1459.7518 | 0.0320 | 80    | K.SDIDEIVLVGGSTR.I    |
| 559.9749 | 1676.9027 | 1676.8005 | 0.1022 | 70    | K.NQLTSNPENTVFDK.R    |
| 630.0210 | 1887.0413 | 1886.9638 | 0.0774 | 68    | K.VTHAVVTVPAYFNDAQR.Q |

## Spot A11

heat shock protein 65 [Mus musculus]  
[gil51455](#) Mass: 60903 Score: 387

| Observed | Mr(expt)  | Mr(calc)  | Delta  | Score | Peptide                             |
|----------|-----------|-----------|--------|-------|-------------------------------------|
| 393.2741 | 784.5336  | 784.5058  | 0.0278 | 57    | K.IGIEIHK.R                         |
| 451.2927 | 900.5709  | 900.5280  | 0.0429 | 72    | K.LSDGVAVLK.V                       |
| 456.8100 | 911.6055  | 911.5803  | 0.0252 | 68    | K.VGLQVVAVK.A                       |
| 608.3605 | 1214.7064 | 1214.6506 | 0.0558 | 67    | K.NAGVEGSLIVEK.I                    |
| 672.8831 | 1343.7517 | 1343.7085 | 0.0432 | 71    | R.TVIEQSWGSPK.V                     |
| 549.6565 | 1645.9476 | 1645.8960 | 0.0516 | 52    | K.VGEVIVTKDDAMLLK.G + Oxidation (M) |

## Spot D1 (score more than 40, spectra manually validated)

Nucleophosmin 1 [Mus musculus]  
[gil55153941](#) Mass: 32568 Score: 147

| Observed | Mr(expt) | Mr(calc) | Delta  | Score | Peptide       |
|----------|----------|----------|--------|-------|---------------|
| 373.2605 | 744.5064 | 744.4745 | 0.0318 | 40    | K.VTLATLK.M   |
| 466.2696 | 930.5247 | 930.4658 | 0.0589 | 61    | K.GPSSVEDIK.A |

## Spot D2

aldolase A [Mus musculus]  
[gil7548322](#) Mass: 39526 Score: 307

| Observed | Mr(expt)  | Mr(calc)  | Delta  | Score | Peptide           |
|----------|-----------|-----------|--------|-------|-------------------|
| 401.2578 | 800.5010  | 800.4756  | 0.0254 | 55    | R.ALQASALK.A      |
| 666.8726 | 1331.7307 | 1331.6932 | 0.0375 | 94    | K.GILAADESTGSIK.R |
